# Supplementary material for: Template synthesis of graphitic hollow carbon nanoballs as supports for SnOxnanoparticles towards enhanced lithium storage performance
Source: Royal Society of Chemistry journal article supplement (doi:10.1039/c8nr00405f), 2018-01-01
Supplement: c8nr00405f1.pdf [file c8nr00405f1.pdf]

## Supporting Information

### Template Synthesis of Graphitic Hollow Carbon Nanoballs as Supports for SnO<sub>x</sub> Nanoparticles towards Enhanced Lithium Storage Performance

Hongkang Wang,\* Jinkai Wang, Sanmu Xie, Wenxing Liu, Chunming Niu

*Center of Nanomaterials for Renewable Energy (CNRE), State Key Lab of Electrical Insulation and Power Equipment, School of Electrical Engineering, Xi'an Jiaotong University, Xi'an 710049, China. E-mail: hongkang.wang@mail.xjtu.edu.cn*

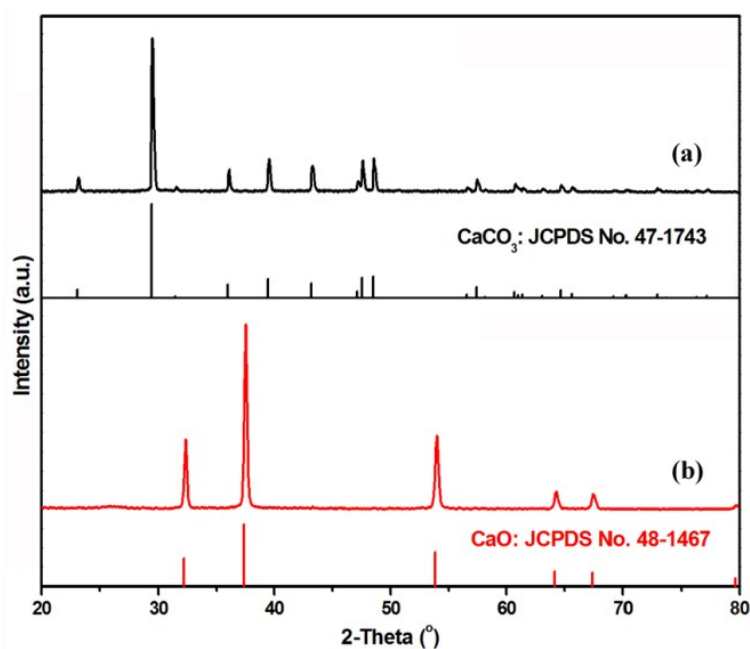

Figure S1. XRD patterns of (a) the CaCO<sub>3</sub> template and (b) the C@CaO counterpart after CVD reaction.

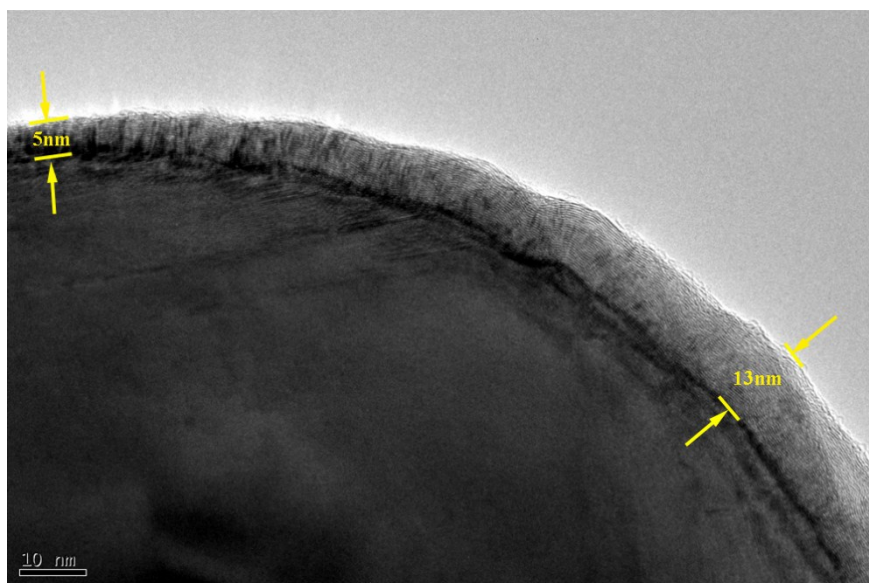

Figure S2. TEM image taken from the interfacial region between CaO core and carbon shell in the C@CaO product.

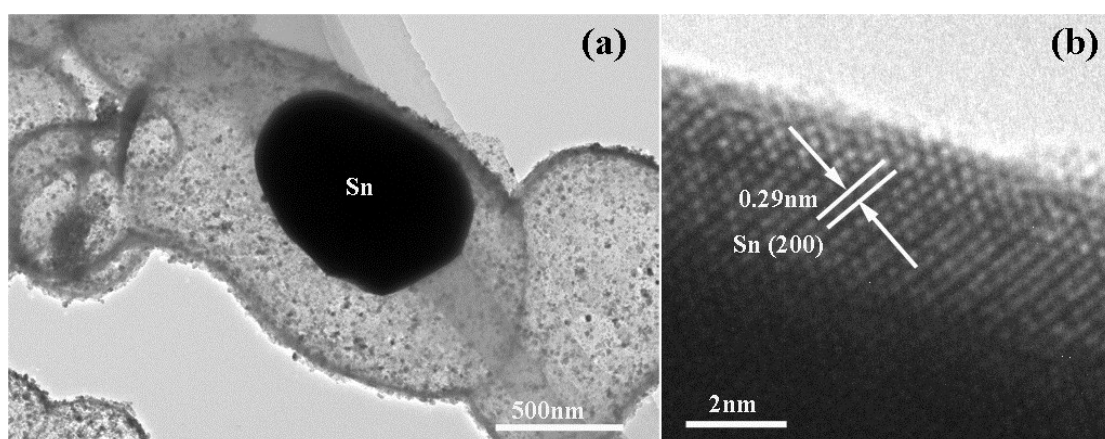

Figure S3. (a) TEM image of the  $\text{SnO}_x\text{@HCNBs}$  showing the presence of large Sn metal particle, and (b) HRTEM image taken from the edge region of a single Sn particle, whose lattice fringes with d spacing of 0.29 nm can be indexed to the (200) plane of metallic Sn phase (JCPDS No. 04-0673).

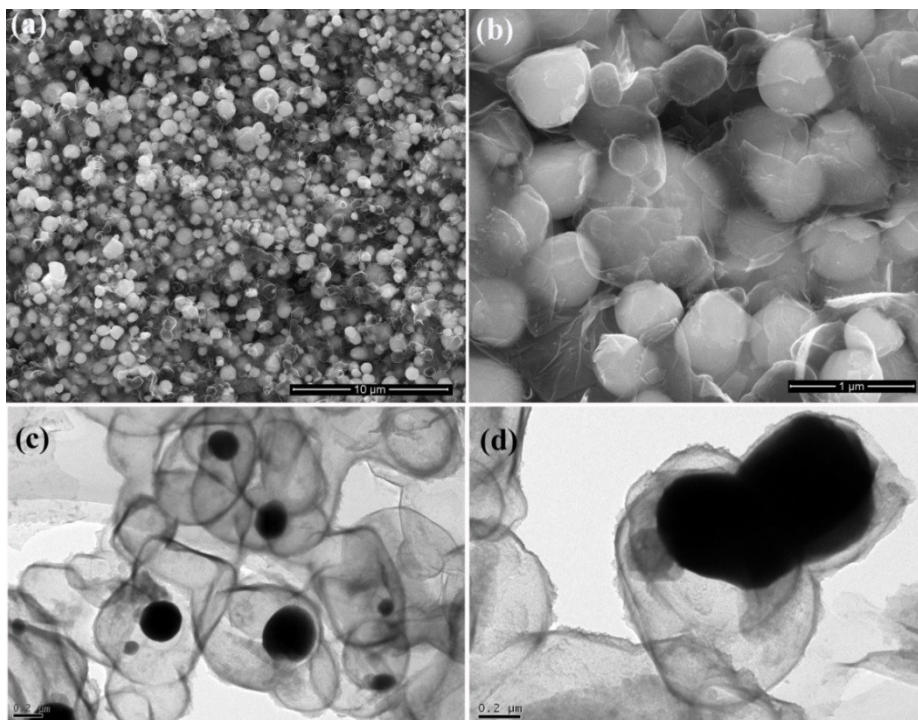

Figure S4. (a, b) SEM and (c, d) TEM image of the Sn@HCNBs obtained by annealing SnO<sub>2</sub>@HCNBs at 900 °C under Ar atmosphere.

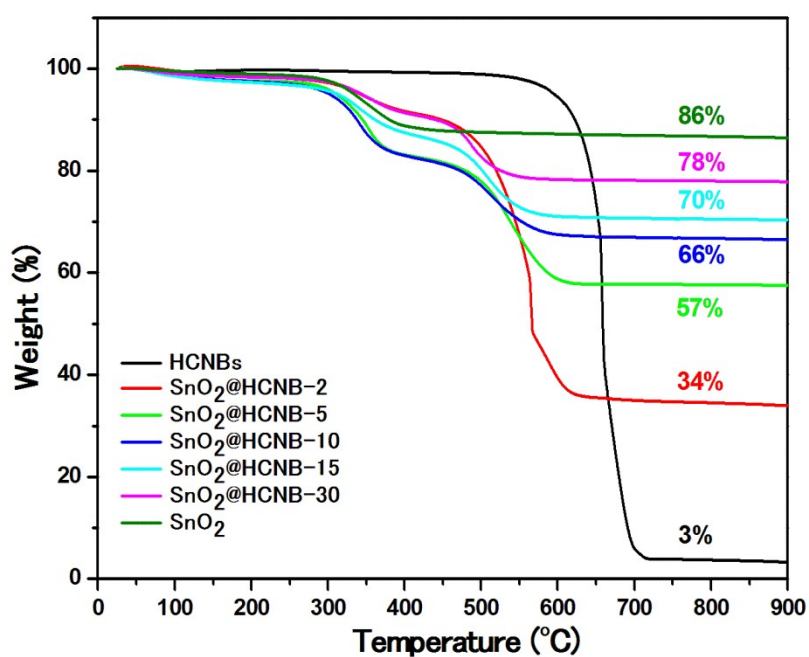

Figure S5. TGA curves of the HCNBs, SnO<sub>2</sub>@HCNB-x (Note: To facilitate the description, SnO<sub>2</sub>@HCNB-x was used somewhere, in which x means the weight ratio of tin (II) 2-ethylhexanoate to HCNBs), and the SnO<sub>2</sub> obtained by annealing tin (II) 2-ethylhexanoate without presence of HCNBs under the same condition.

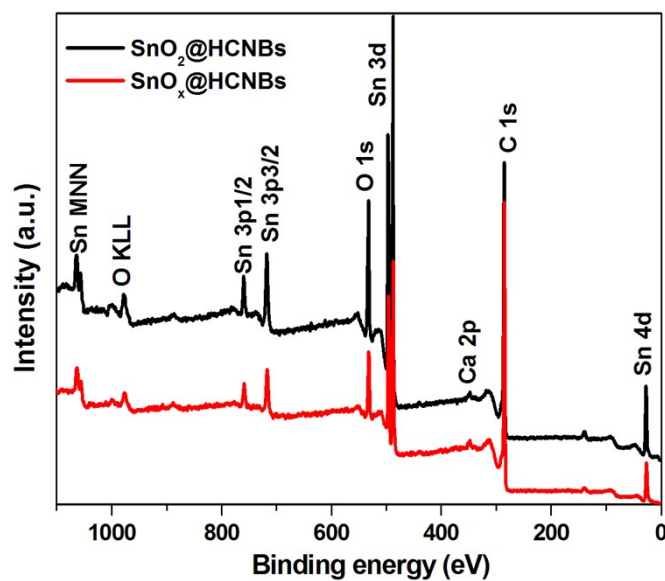

Figure S6. Survey XPS spectra of  $\text{SnO}_2@\text{HCNBs}$  and  $\text{SnO}_x@\text{HCNBs}$ .

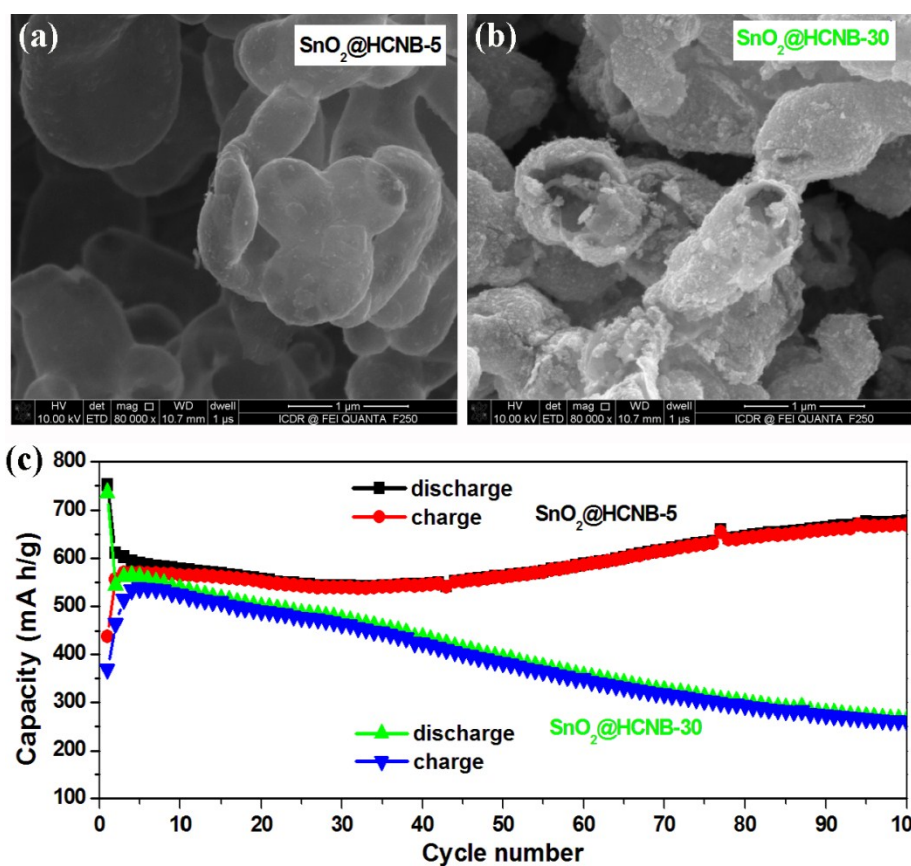

Figure S7. (a, b) SEM images of (a)  $\text{SnO}_2@\text{HCNB-5}$  and (b)  $\text{SnO}_2@\text{HCNB-30}$ , and (c) their cycle performance at 200 mA/g. These result indicates that too less  $\text{SnO}_2$  results in a low specific capacity, while too much  $\text{SnO}_2$  in the composites suffers from bad cycle stability and lower specific capacity.

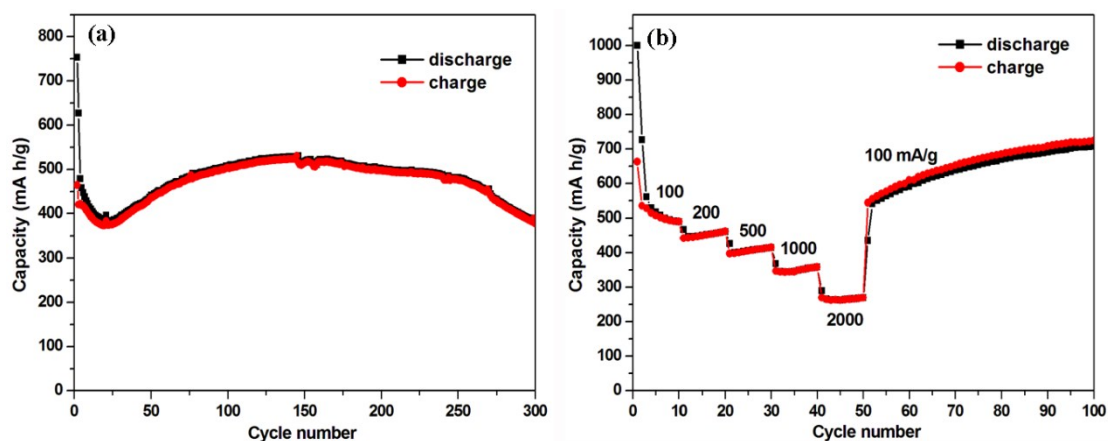

Figure S8. (a) cycle performance at 200 mA/g, and (b) rate performance of Sn@HCNBs obtained by annealing SnO<sub>2</sub>@HCNBs at 900 °C under Ar atmosphere (corresponding to the images in Figure S4).
